# Supplementary material for: Gender differences and bias in open source: pull request acceptance of women versus men
Source: PeerJ journal article supplement (doi:10.7717/peerj-cs.111), 2017-05-01
Supplement: data.pdf [file data.pdf]

788 **Supplemental Files: Data**

789 Here we include raw data that were used in the figures. Data from Figure 2. For women:

|     | y    | xmin | xmax |
|-----|------|------|------|
|     | 0.04 | 0.00 | 0.10 |
|     | 0.02 | 0.10 | 0.20 |
|     | 0.01 | 0.20 | 0.30 |
|     | 0.04 | 0.30 | 0.40 |
| 790 | 0.04 | 0.40 | 0.50 |
|     | 0.06 | 0.50 | 0.60 |
|     | 0.08 | 0.60 | 0.70 |
|     | 0.14 | 0.70 | 0.80 |
|     | 0.19 | 0.80 | 0.90 |
|     | 0.38 | 0.90 | 1.00 |

791 For men:

|     | y    | xmin | xmax |
|-----|------|------|------|
|     | 0.02 | 0.00 | 0.10 |
|     | 0.03 | 0.10 | 0.20 |
|     | 0.02 | 0.20 | 0.30 |
|     | 0.06 | 0.30 | 0.40 |
| 792 | 0.08 | 0.40 | 0.50 |
|     | 0.10 | 0.50 | 0.60 |
|     | 0.12 | 0.60 | 0.70 |
|     | 0.17 | 0.70 | 0.80 |
|     | 0.17 | 0.80 | 0.90 |
|     | 0.24 | 0.90 | 1.00 |

793 Data from Figure 3:

| gender | index | avg_acceptance_rate | users  | lower     | upper     |
|--------|-------|---------------------|--------|-----------|-----------|
| Women  | 1     | 0.6760892           | 18484  | 0.6692886 | 0.6828344 |
| Men    | 1     | 0.6160319           | 280204 | 0.6142281 | 0.6178332 |
| Women  | 2     | 0.7050353           | 10347  | 0.6961433 | 0.7138117 |
| Men    | 2     | 0.6405913           | 179849 | 0.6383687 | 0.6428094 |
| Women  | 3     | 0.7190213           | 7425   | 0.7086457 | 0.7292248 |
| Men    | 3     | 0.6569279           | 137040 | 0.6544074 | 0.6594417 |
| Women  | 4     | 0.7329411           | 5973   | 0.7215255 | 0.7441288 |
| Men    | 4     | 0.6688600           | 111860 | 0.6660933 | 0.6716180 |
| Women  | 5     | 0.7460979           | 5022   | 0.7338198 | 0.7580893 |
| Men    | 5     | 0.6794739           | 94727  | 0.6764913 | 0.6824455 |
| Women  | 6     | 0.7525368           | 4404   | 0.7395133 | 0.7652247 |
| Men    | 6     | 0.6882366           | 82240  | 0.6850580 | 0.6914018 |
| Women  | 7     | 0.7588315           | 3887   | 0.7450628 | 0.7722101 |
| Men    | 7     | 0.6959290           | 72847  | 0.6925739 | 0.6992686 |
| Women  | 8     | 0.7637902           | 3480   | 0.7493161 | 0.7778198 |
| Men    | 8     | 0.7024134           | 65242  | 0.6988885 | 0.7059202 |
| Women  | 9     | 0.7717241           | 3111   | 0.7565628 | 0.7863728 |
| Men    | 9     | 0.7073456           | 59215  | 0.7036625 | 0.7110084 |
| Women  | 10    | 0.7788235           | 2831   | 0.7630742 | 0.7939943 |
| Men    | 10    | 0.7123735           | 54319  | 0.7085464 | 0.7161779 |
| Women  | 11    | 0.7818047           | 2569   | 0.7653223 | 0.7976422 |
| Men    | 11    | 0.7166350           | 50089  | 0.7126661 | 0.7205787 |
| Women  | 12    | 0.7855369           | 2369   | 0.7684496 | 0.8019151 |
| Men    | 12    | 0.7204466           | 46382  | 0.7163379 | 0.7245276 |
| Women  | 13    | 0.7891739           | 2229   | 0.7716415 | 0.8059427 |
| Men    | 13    | 0.7238599           | 43075  | 0.7196112 | 0.7280784 |
| Women  | 14    | 0.7929914           | 2074   | 0.7749050 | 0.8102458 |
| Men    | 14    | 0.7281115           | 40265  | 0.7237368 | 0.7324532 |
| Women  | 15    | 0.7950017           | 1953   | 0.7764047 | 0.8127086 |
| Men    | 15    | 0.7315838           | 37881  | 0.7270905 | 0.7360415 |
| Women  | 16    | 0.7993072           | 1804   | 0.7800678 | 0.8175681 |
| Men    | 16    | 0.7346437           | 35576  | 0.7300226 | 0.7392265 |
| Women  | 17    | 0.8017152           | 1713   | 0.7820324 | 0.8203586 |
| Men    | 17    | 0.7370609           | 33537  | 0.7323140 | 0.7417666 |
| Women  | 18    | 0.8015990           | 1635   | 0.7814288 | 0.8206802 |
| Men    | 18    | 0.7399629           | 31796  | 0.7351038 | 0.7447780 |
| Women  | 19    | 0.8047021           | 1557   | 0.7841229 | 0.8241253 |
| Men    | 19    | 0.7428781           | 30133  | 0.7379036 | 0.7478058 |

|       |    |           |       |           |           |
|-------|----|-----------|-------|-----------|-----------|
| Women | 20 | 0.8015455 | 1494  | 0.7804025 | 0.8214959 |
| Men   | 20 | 0.7443410 | 28576 | 0.7392410 | 0.7493913 |
| Women | 21 | 0.8049968 | 1425  | 0.7834547 | 0.8252735 |
| Men   | 21 | 0.7467274 | 27244 | 0.7415189 | 0.7518832 |
| Women | 22 | 0.8078371 | 1357  | 0.7858479 | 0.8284842 |
| Men   | 22 | 0.7483787 | 25959 | 0.7430529 | 0.7536487 |
| Women | 23 | 0.8093061 | 1303  | 0.7869035 | 0.8303038 |
| Men   | 23 | 0.7499043 | 24802 | 0.7444654 | 0.7552846 |
| Women | 24 | 0.8112631 | 1258  | 0.7885247 | 0.8325364 |
| Men   | 24 | 0.7511206 | 23755 | 0.7455708 | 0.7566088 |
| Women | 25 | 0.8114060 | 1202  | 0.7881237 | 0.8331534 |
| Men   | 25 | 0.7534511 | 22820 | 0.7478051 | 0.7590325 |
| Women | 26 | 0.8136305 | 1156  | 0.7899626 | 0.8356901 |
| Men   | 26 | 0.7548082 | 21895 | 0.7490535 | 0.7604953 |
| Women | 27 | 0.8130176 | 1120  | 0.7889255 | 0.8354526 |
| Men   | 27 | 0.7564985 | 21078 | 0.7506455 | 0.7622807 |
| Women | 28 | 0.8119847 | 1069  | 0.7872477 | 0.8349904 |
| Men   | 28 | 0.7581168 | 20318 | 0.7521673 | 0.7639923 |
| Women | 29 | 0.8133727 | 1033  | 0.7882489 | 0.8366961 |
| Men   | 29 | 0.7597981 | 19573 | 0.7537494 | 0.7657696 |
| Women | 30 | 0.8162735 | 989   | 0.7907034 | 0.8399444 |
| Men   | 30 | 0.7610487 | 18847 | 0.7548940 | 0.7671228 |
| Women | 31 | 0.8156315 | 955   | 0.7895534 | 0.8397460 |
| Men   | 31 | 0.7627928 | 18207 | 0.7565450 | 0.7689566 |
| Women | 32 | 0.8169897 | 908   | 0.7902737 | 0.8416302 |
| Men   | 32 | 0.7636369 | 17596 | 0.7572879 | 0.7698987 |
| Women | 33 | 0.8192583 | 874   | 0.7921127 | 0.8442310 |
| Men   | 33 | 0.7651109 | 16972 | 0.7586584 | 0.7714723 |
| Women | 34 | 0.8156378 | 850   | 0.7879020 | 0.8411644 |
| Men   | 34 | 0.7663505 | 16462 | 0.7598094 | 0.7727974 |
| Women | 35 | 0.8124301 | 803   | 0.7836783 | 0.8388658 |
| Men   | 35 | 0.7673967 | 15947 | 0.7607596 | 0.7739362 |
| Women | 36 | 0.8130689 | 782   | 0.7839433 | 0.8398106 |
| Men   | 36 | 0.7681725 | 15453 | 0.7614365 | 0.7748075 |
| Women | 37 | 0.8153324 | 749   | 0.7856532 | 0.8425028 |
| Men   | 37 | 0.7693243 | 15000 | 0.7624976 | 0.7760464 |
| Women | 38 | 0.8147635 | 723   | 0.7844900 | 0.8424415 |
| Men   | 38 | 0.7704708 | 14537 | 0.7635466 | 0.7772866 |
| Women | 39 | 0.8185874 | 702   | 0.7880490 | 0.8464186 |
| Men   | 39 | 0.7714715 | 14119 | 0.7644547 | 0.7783763 |
| Women | 40 | 0.8199676 | 668   | 0.7886895 | 0.8483861 |

|       |    |           |       |           |           |
|-------|----|-----------|-------|-----------|-----------|
| Men   | 40 | 0.7725769 | 13744 | 0.7654755 | 0.7795628 |
| Women | 41 | 0.8199978 | 643   | 0.7880772 | 0.8489458 |
| Men   | 41 | 0.7727975 | 13372 | 0.7655990 | 0.7798771 |
| Women | 42 | 0.8195750 | 635   | 0.7874147 | 0.8487288 |
| Men   | 42 | 0.7734144 | 12934 | 0.7661002 | 0.7806054 |
| Women | 43 | 0.8232254 | 621   | 0.7909009 | 0.8524387 |
| Men   | 43 | 0.7738906 | 12580 | 0.7664781 | 0.7811761 |
| Women | 44 | 0.8238081 | 613   | 0.7912942 | 0.8531638 |
| Men   | 44 | 0.7745111 | 12268 | 0.7670106 | 0.7818810 |
| Women | 45 | 0.8241885 | 591   | 0.7910547 | 0.8540408 |
| Men   | 45 | 0.7755378 | 11906 | 0.7679345 | 0.7830062 |
| Women | 46 | 0.8263839 | 568   | 0.7926779 | 0.8566498 |
| Men   | 46 | 0.7764389 | 11611 | 0.7687489 | 0.7839901 |
| Women | 47 | 0.8279574 | 546   | 0.7936318 | 0.8586846 |
| Men   | 47 | 0.7767706 | 11298 | 0.7689772 | 0.7844212 |
| Women | 48 | 0.8265993 | 534   | 0.7917686 | 0.8577650 |
| Men   | 48 | 0.7779866 | 11014 | 0.7701067 | 0.7857194 |
| Women | 49 | 0.8276313 | 513   | 0.7921092 | 0.8593237 |
| Men   | 49 | 0.7778456 | 10769 | 0.7698734 | 0.7856673 |
| Women | 50 | 0.8326880 | 501   | 0.7970646 | 0.8643261 |
| Men   | 50 | 0.7788493 | 10468 | 0.7707742 | 0.7867690 |
| Women | 51 | 0.8291343 | 486   | 0.7926650 | 0.8615387 |
| Men   | 51 | 0.7794244 | 10262 | 0.7712747 | 0.7874153 |
| Women | 52 | 0.8291512 | 481   | 0.7924783 | 0.8617159 |
| Men   | 52 | 0.7808134 | 10009 | 0.7725777 | 0.7888854 |
| Women | 53 | 0.8280056 | 463   | 0.7904842 | 0.8612718 |
| Men   | 53 | 0.7814607 | 9797  | 0.7731435 | 0.7896103 |
| Women | 54 | 0.8277863 | 454   | 0.7898476 | 0.8613871 |
| Men   | 54 | 0.7820142 | 9597  | 0.7736167 | 0.7902402 |
| Women | 55 | 0.8296065 | 441   | 0.7911994 | 0.8635200 |
| Men   | 55 | 0.7823689 | 9404  | 0.7738891 | 0.7906735 |
| Women | 56 | 0.8264406 | 421   | 0.7868143 | 0.8614028 |
| Men   | 56 | 0.7830378 | 9196  | 0.7744702 | 0.7914258 |
| Women | 57 | 0.8288772 | 408   | 0.7887544 | 0.8641479 |
| Men   | 57 | 0.7824771 | 8986  | 0.7738005 | 0.7909702 |
| Women | 58 | 0.8324038 | 395   | 0.7918433 | 0.8678943 |
| Men   | 58 | 0.7833750 | 8780  | 0.7746081 | 0.7919536 |
| Women | 59 | 0.8354096 | 381   | 0.7942855 | 0.8712249 |
| Men   | 59 | 0.7830861 | 8612  | 0.7742285 | 0.7917518 |
| Women | 60 | 0.8343453 | 374   | 0.7927139 | 0.8705845 |
| Men   | 60 | 0.7835263 | 8434  | 0.7745804 | 0.7922759 |

|       |    |           |      |           |           |
|-------|----|-----------|------|-----------|-----------|
| Women | 61 | 0.8361843 | 362  | 0.7939563 | 0.8728065 |
| Men   | 61 | 0.7838079 | 8300 | 0.7747929 | 0.7926233 |
| Women | 62 | 0.8370162 | 351  | 0.7941378 | 0.8740949 |
| Men   | 62 | 0.7856078 | 8112 | 0.7765135 | 0.7944964 |
| Women | 63 | 0.8345538 | 334  | 0.7902743 | 0.8727793 |
| Men   | 63 | 0.7860959 | 7954 | 0.7769174 | 0.7950642 |
| Women | 64 | 0.8341767 | 325  | 0.7891936 | 0.8729422 |
| Men   | 64 | 0.7858930 | 7793 | 0.7766154 | 0.7949563 |
| Women | 65 | 0.8343326 | 318  | 0.7888205 | 0.8734847 |
| Men   | 65 | 0.7859420 | 7596 | 0.7765434 | 0.7951207 |
| Women | 66 | 0.8317838 | 312  | 0.7855667 | 0.8715675 |
| Men   | 66 | 0.7864083 | 7468 | 0.7769351 | 0.7956573 |
| Women | 67 | 0.8303346 | 302  | 0.7831521 | 0.8708968 |
| Men   | 67 | 0.7864833 | 7291 | 0.7768949 | 0.7958421 |
| Women | 68 | 0.8304330 | 296  | 0.7827341 | 0.8713728 |
| Men   | 68 | 0.7869328 | 7178 | 0.7772749 | 0.7963572 |
| Women | 69 | 0.8324168 | 290  | 0.7843542 | 0.8735348 |
| Men   | 69 | 0.7864303 | 7019 | 0.7766535 | 0.7959687 |
| Women | 70 | 0.8344468 | 287  | 0.7862928 | 0.8755378 |
| Men   | 70 | 0.7866845 | 6920 | 0.7768407 | 0.7962862 |
| Women | 71 | 0.8344045 | 284  | 0.7859657 | 0.8757052 |
| Men   | 71 | 0.7868372 | 6785 | 0.7768965 | 0.7965308 |
| Women | 72 | 0.8321266 | 287  | 0.7837605 | 0.8734805 |
| Men   | 72 | 0.7874045 | 6690 | 0.7774013 | 0.7971565 |
| Women | 73 | 0.8326805 | 272  | 0.7829072 | 0.8750345 |
| Men   | 73 | 0.7874954 | 6551 | 0.7773861 | 0.7973482 |
| Women | 74 | 0.8279765 | 270  | 0.7775657 | 0.8710217 |
| Men   | 74 | 0.7881556 | 6430 | 0.7779608 | 0.7980885 |
| Women | 75 | 0.8291681 | 265  | 0.7783425 | 0.8724581 |
| Men   | 75 | 0.7884296 | 6335 | 0.7781616 | 0.7984313 |
| Women | 76 | 0.8293336 | 262  | 0.7782017 | 0.8728381 |
| Men   | 76 | 0.7891249 | 6221 | 0.7787732 | 0.7992047 |
| Women | 77 | 0.8299025 | 250  | 0.7774768 | 0.8743130 |
| Men   | 77 | 0.7892692 | 6119 | 0.7788323 | 0.7994296 |
| Women | 78 | 0.8292627 | 246  | 0.7763039 | 0.8740898 |
| Men   | 78 | 0.7896568 | 6012 | 0.7791323 | 0.7998995 |
| Women | 79 | 0.8273422 | 241  | 0.7735918 | 0.8728390 |
| Men   | 79 | 0.7895738 | 5932 | 0.7789755 | 0.7998864 |
| Women | 80 | 0.8283849 | 233  | 0.7737164 | 0.8744826 |
| Men   | 80 | 0.7891862 | 5844 | 0.7784999 | 0.7995830 |
| Women | 81 | 0.8267307 | 231  | 0.7716391 | 0.8732211 |

|       |     |           |      |           |           |
|-------|-----|-----------|------|-----------|-----------|
| Men   | 81  | 0.7892257 | 5751 | 0.7784522 | 0.7997050 |
| Women | 82  | 0.8257364 | 232  | 0.7706818 | 0.8722545 |
| Men   | 82  | 0.7905467 | 5639 | 0.7796883 | 0.8011037 |
| Women | 83  | 0.8244285 | 225  | 0.7683010 | 0.8717855 |
| Men   | 83  | 0.7904742 | 5582 | 0.7795580 | 0.8010860 |
| Women | 84  | 0.8248941 | 221  | 0.7682480 | 0.8725943 |
| Men   | 84  | 0.7902548 | 5509 | 0.7792609 | 0.8009405 |
| Women | 85  | 0.8225989 | 215  | 0.7648533 | 0.8712114 |
| Men   | 85  | 0.7922640 | 5442 | 0.7812382 | 0.8029755 |
| Women | 86  | 0.8213745 | 216  | 0.7636605 | 0.8700345 |
| Men   | 86  | 0.7912750 | 5335 | 0.7801182 | 0.8021122 |
| Women | 87  | 0.8222069 | 210  | 0.7636604 | 0.8714103 |
| Men   | 87  | 0.7913031 | 5272 | 0.7800789 | 0.8022039 |
| Women | 88  | 0.8177248 | 204  | 0.7577879 | 0.8681771 |
| Men   | 88  | 0.7912294 | 5199 | 0.7799234 | 0.8022075 |
| Women | 89  | 0.8176426 | 199  | 0.7568625 | 0.8686975 |
| Men   | 89  | 0.7906924 | 5082 | 0.7792438 | 0.8018061 |
| Women | 90  | 0.8138759 | 196  | 0.7522159 | 0.8657803 |
| Men   | 90  | 0.7913450 | 5047 | 0.7798684 | 0.8024837 |
| Women | 91  | 0.8138972 | 190  | 0.7511608 | 0.8665630 |
| Men   | 91  | 0.7924532 | 4957 | 0.7808920 | 0.8036691 |
| Women | 92  | 0.8132713 | 186  | 0.7497244 | 0.8665479 |
| Men   | 92  | 0.7927282 | 4871 | 0.7810683 | 0.8040362 |
| Women | 93  | 0.8169674 | 184  | 0.7533987 | 0.8700247 |
| Men   | 93  | 0.7929837 | 4797 | 0.7812372 | 0.8043726 |
| Women | 94  | 0.8179654 | 183  | 0.7543021 | 0.8710241 |
| Men   | 94  | 0.7928731 | 4720 | 0.7810266 | 0.8043562 |
| Women | 95  | 0.8217093 | 179  | 0.7576353 | 0.8748041 |
| Men   | 95  | 0.7933051 | 4662 | 0.7813921 | 0.8048496 |
| Women | 96  | 0.8208033 | 179  | 0.7566360 | 0.8740237 |
| Men   | 96  | 0.7936025 | 4593 | 0.7816042 | 0.8052264 |
| Women | 97  | 0.8199880 | 172  | 0.7542812 | 0.8743231 |
| Men   | 97  | 0.7946616 | 4536 | 0.7826080 | 0.8063347 |
| Women | 98  | 0.8217064 | 170  | 0.7557462 | 0.8760939 |
| Men   | 98  | 0.7946537 | 4480 | 0.7825229 | 0.8063991 |
| Women | 99  | 0.8190445 | 169  | 0.7525858 | 0.8739609 |
| Men   | 99  | 0.7957751 | 4436 | 0.7836063 | 0.8075533 |
| Women | 100 | 0.8246681 | 160  | 0.7567370 | 0.8801694 |
| Men   | 100 | 0.7946821 | 4386 | 0.7824194 | 0.8065511 |
| Women | 101 | 0.8245670 | 157  | 0.7558934 | 0.8805722 |
| Men   | 101 | 0.7955189 | 4324 | 0.7831840 | 0.8074533 |

|       |     |           |      |           |           |
|-------|-----|-----------|------|-----------|-----------|
| Women | 102 | 0.8217492 | 154  | 0.7520102 | 0.8786849 |
| Men   | 102 | 0.7949741 | 4274 | 0.7825539 | 0.8069899 |
| Women | 103 | 0.8199267 | 152  | 0.7494705 | 0.8774841 |
| Men   | 103 | 0.7957856 | 4233 | 0.7833212 | 0.8078405 |
| Women | 104 | 0.8204773 | 145  | 0.7481767 | 0.8792185 |
| Men   | 104 | 0.7956220 | 4183 | 0.7830779 | 0.8077519 |
| Women | 105 | 0.8210897 | 144  | 0.7485733 | 0.8799234 |
| Men   | 105 | 0.7966794 | 4132 | 0.7840790 | 0.8088589 |
| Women | 106 | 0.8196439 | 143  | 0.7466790 | 0.8788932 |
| Men   | 106 | 0.7967403 | 4052 | 0.7840142 | 0.8090371 |
| Women | 107 | 0.8199753 | 140  | 0.7461647 | 0.8797548 |
| Men   | 107 | 0.7969661 | 4007 | 0.7841719 | 0.8093259 |
| Women | 108 | 0.8178260 | 141  | 0.7440740 | 0.8777461 |
| Men   | 108 | 0.7976275 | 3961 | 0.7847719 | 0.8100425 |
| Women | 109 | 0.8278513 | 134  | 0.7531010 | 0.8875503 |
| Men   | 109 | 0.7973731 | 3916 | 0.7844361 | 0.8098647 |
| Women | 110 | 0.8260814 | 130  | 0.7498115 | 0.8869143 |
| Men   | 110 | 0.7973383 | 3869 | 0.7843202 | 0.8099058 |
| Women | 111 | 0.8257761 | 132  | 0.7501324 | 0.8862368 |
| Men   | 111 | 0.7980455 | 3805 | 0.7849314 | 0.8107001 |
| Women | 112 | 0.8338149 | 128  | 0.7578198 | 0.8937351 |
| Men   | 112 | 0.7986930 | 3754 | 0.7855026 | 0.8114167 |
| Women | 113 | 0.8377800 | 122  | 0.7601727 | 0.8982917 |
| Men   | 113 | 0.7986873 | 3703 | 0.7854037 | 0.8114977 |
| Women | 114 | 0.8371430 | 121  | 0.7590819 | 0.8979985 |
| Men   | 114 | 0.7981363 | 3652 | 0.7847449 | 0.8110488 |
| Women | 115 | 0.8352116 | 119  | 0.7561408 | 0.8968869 |
| Men   | 115 | 0.7977243 | 3594 | 0.7842126 | 0.8107500 |
| Women | 116 | 0.8375241 | 121  | 0.7595132 | 0.8983088 |
| Men   | 116 | 0.7969764 | 3572 | 0.7834045 | 0.8100605 |
| Women | 117 | 0.8382467 | 118  | 0.7591919 | 0.8995871 |
| Men   | 117 | 0.7988082 | 3525 | 0.7851868 | 0.8119321 |
| Women | 118 | 0.8383052 | 117  | 0.7588678 | 0.8998700 |
| Men   | 118 | 0.7990702 | 3513 | 0.7854312 | 0.8122097 |
| Women | 119 | 0.8374472 | 114  | 0.7566895 | 0.8999005 |
| Men   | 119 | 0.7996992 | 3452 | 0.7859519 | 0.8129370 |
| Women | 120 | 0.8337159 | 111  | 0.7511982 | 0.8976432 |
| Men   | 120 | 0.7994452 | 3417 | 0.7856195 | 0.8127566 |
| Women | 121 | 0.8331026 | 109  | 0.7496297 | 0.8976730 |
| Men   | 121 | 0.7998138 | 3383 | 0.7859258 | 0.8131817 |
| Women | 122 | 0.8330852 | 109  | 0.7496099 | 0.8976590 |

|       |     |           |      |           |           |
|-------|-----|-----------|------|-----------|-----------|
| Men   | 122 | 0.7988653 | 3349 | 0.7848817 | 0.8123251 |
| Women | 123 | 0.8332757 | 108  | 0.7493790 | 0.8980804 |
| Men   | 123 | 0.7999253 | 3307 | 0.7858766 | 0.8134416 |
| Women | 124 | 0.8323862 | 106  | 0.7474561 | 0.8979108 |
| Men   | 124 | 0.7995698 | 3268 | 0.7854263 | 0.8131752 |
| Women | 125 | 0.8327743 | 106  | 0.7478962 | 0.8982230 |
| Men   | 125 | 0.7998064 | 3239 | 0.7856037 | 0.8134656 |
| Women | 126 | 0.8308811 | 104  | 0.7448058 | 0.8972640 |
| Men   | 126 | 0.7996539 | 3200 | 0.7853585 | 0.8133994 |
| Women | 127 | 0.8303868 | 103  | 0.7437619 | 0.8971552 |
| Men   | 127 | 0.7988979 | 3170 | 0.7845141 | 0.8127281 |
| Women | 128 | 0.8303200 | 103  | 0.7436862 | 0.8971015 |
| Men   | 128 | 0.7992543 | 3122 | 0.7847660 | 0.8131797 |

794 Data from Figure 4:

|     | gender | repos | accept    | users  | lower     | upper     |
|-----|--------|-------|-----------|--------|-----------|-----------|
|     | Women  | 1     | 0.6795875 | 12672  | 0.6713829 | 0.6877096 |
|     | Men    | 1     | 0.6297586 | 146770 | 0.6272823 | 0.6322298 |
|     | Women  | 2     | 0.6950743 | 3019   | 0.6783032 | 0.7114665 |
|     | Men    | 2     | 0.6443411 | 50693  | 0.6401558 | 0.6485099 |
|     | Women  | 3     | 0.7191161 | 1282   | 0.6936410 | 0.7435824 |
|     | Men    | 3     | 0.6529540 | 25763  | 0.6471048 | 0.6587687 |
|     | Women  | 4     | 0.7226252 | 678    | 0.6872680 | 0.7560314 |
|     | Men    | 4     | 0.6586880 | 15352  | 0.6511255 | 0.6661902 |
|     | Women  | 5     | 0.7348727 | 418    | 0.6897933 | 0.7765913 |
| 795 | Men    | 5     | 0.6676392 | 10473  | 0.6585241 | 0.6766610 |
|     | Women  | 6     | 0.7377373 | 252    | 0.6788436 | 0.7909441 |
|     | Men    | 6     | 0.6792418 | 7555   | 0.6685827 | 0.6897624 |
|     | Women  | 7     | 0.7156170 | 165    | 0.6402858 | 0.7830244 |
|     | Men    | 7     | 0.6776849 | 5500   | 0.6651506 | 0.6900304 |
|     | Women  | 8     | 0.7158760 | 146    | 0.6354011 | 0.7873663 |
|     | Men    | 8     | 0.6829547 | 4265   | 0.6687506 | 0.6969079 |
|     | Women  | 9     | 0.7221513 | 111    | 0.6291047 | 0.8029734 |
|     | Men    | 9     | 0.6823148 | 3341   | 0.6662237 | 0.6980863 |
|     | Women  | 10    | 0.7413723 | 83     | 0.6335540 | 0.8313090 |
|     | Men    | 10    | 0.6941974 | 2765   | 0.6766439 | 0.7113389 |



796 Data from Figure 5:

| gender | pulls  | extension | merge_rate | lower     | upper     | p         | p.adj     |
|--------|--------|-----------|------------|-----------|-----------|-----------|-----------|
| Female | 642    | .c *      | 0.7414330  | 0.7057234 | 0.7749053 | 0.0332490 | 0.0474986 |
| Male   | 39909  | .c *      | 0.7019219  | 0.6974071 | 0.7064073 | 0.0332490 | 0.0474986 |
| Female | 1872   | .cpp *    | 0.8263889  | 0.8084559 | 0.8432927 | 0.0000406 | 0.0000739 |
| Male   | 60571  | .cpp *    | 0.7867461  | 0.7834622 | 0.7900026 | 0.0000406 | 0.0000739 |
| Male   | 41996  | .cs *     | 0.7696209  | 0.7655632 | 0.7736413 | 0.0000001 | 0.0000003 |
| Female | 1295   | .cs *     | 0.8324324  | 0.8109560 | 0.8523876 | 0.0000001 | 0.0000003 |
| Female | 4342   | .css *    | 0.8555965  | 0.8447873 | 0.8659249 | 0.0000000 | 0.0000000 |
| Male   | 39899  | .css *    | 0.7842552  | 0.7801860 | 0.7882831 | 0.0000000 | 0.0000000 |
| Female | 777    | .go *     | 0.8687259  | 0.8429339 | 0.8916789 | 0.0000010 | 0.0000020 |
| Male   | 30776  | .go *     | 0.7967572  | 0.7922172 | 0.8012412 | 0.0000010 | 0.0000020 |
| Female | 10847  | .html *   | 0.8441044  | 0.8371394 | 0.8508841 | 0.0000000 | 0.0000000 |
| Male   | 100477 | .html *   | 0.8133304  | 0.8109071 | 0.8157356 | 0.0000000 | 0.0000000 |
| Male   | 190899 | .java *   | 0.6910722  | 0.6889940 | 0.6931446 | 0.0000000 | 0.0000000 |
| Female | 9110   | .java *   | 0.7515917  | 0.7425843 | 0.7604378 | 0.0000000 | 0.0000000 |
| Female | 12559  | .js *     | 0.7851740  | 0.7778856 | 0.7923299 | 0.0000000 | 0.0000000 |
| Male   | 346055 | .js *     | 0.7290517  | 0.7275676 | 0.7305321 | 0.0000000 | 0.0000000 |
| Female | 2304   | .json *   | 0.8802083  | 0.8662468 | 0.8931947 | 0.0000000 | 0.0000000 |
| Male   | 49310  | .json *   | 0.7688096  | 0.7650625 | 0.7725249 | 0.0000000 | 0.0000000 |
| Female | 848    | .m        | 0.7334906  | 0.7023648 | 0.7629838 | 0.1565347 | 0.1956684 |
| Male   | 28920  | .m        | 0.7105118  | 0.7052465 | 0.7157347 | 0.1565347 | 0.1956684 |
| Female | 661    | .markdown | 0.8184569  | 0.7869141 | 0.8471233 | 0.6017781 | 0.6686423 |
| Male   | 14143  | .markdown | 0.8095171  | 0.8029466 | 0.8159600 | 0.6017781 | 0.6686423 |
| Female | 11937  | .md       | 0.7870487  | 0.7795931 | 0.7943640 | 0.8409334 | 0.8851931 |
| Male   | 203984 | .md       | 0.7878657  | 0.7860851 | 0.7896382 | 0.8409334 | 0.8851931 |
| Female | 6322   | .php *    | 0.7809238  | 0.7705204 | 0.7910673 | 0.0000000 | 0.0000000 |
| Male   | 180253 | .php *    | 0.7342957  | 0.7322500 | 0.7363338 | 0.0000000 | 0.0000000 |
| Female | 95     | .podspec  | 0.8105263  | 0.7171813 | 0.8836652 | 0.4626522 | 0.5442967 |
| Male   | 7671   | .podspec  | 0.8434363  | 0.8351090 | 0.8515018 | 0.4626522 | 0.5442967 |
| Male   | 243120 | .py *     | 0.7760242  | 0.7743616 | 0.7776801 | 0.0000000 | 0.0000000 |
| Female | 9281   | .py *     | 0.8070251  | 0.7988467 | 0.8150104 | 0.0000000 | 0.0000000 |
| Female | 14165  | .rb *     | 0.8004236  | 0.7937449 | 0.8069786 | 0.0000000 | 0.0000000 |
| Male   | 238851 | .rb *     | 0.7135285  | 0.7117107 | 0.7153411 | 0.0000000 | 0.0000000 |
| Male   | 29974  | .rst *    | 0.8114032  | 0.8069279 | 0.8158181 | 0.0304430 | 0.0468353 |
| Female | 1206   | .rst *    | 0.8366501  | 0.8145557 | 0.8570884 | 0.0304430 | 0.0468353 |
| Male   | 40154  | .txt *    | 0.7459531  | 0.7416650 | 0.7502055 | 0.0033521 | 0.0055868 |
| Female | 3738   | .txt *    | 0.7239165  | 0.7092799 | 0.7382023 | 0.0033521 | 0.0055868 |
| Male   | 55352  | .xml      | 0.7386544  | 0.7349727 | 0.7423111 | 0.9346622 | 0.9346622 |
| Female | 2119   | .xml      | 0.7376121  | 0.7183244 | 0.7562403 | 0.9346622 | 0.9346622 |

|        |       |       |           |           |           |           |           |
|--------|-------|-------|-----------|-----------|-----------|-----------|-----------|
| Male   | 37030 | .yaml | 0.7751823 | 0.7708953 | 0.7794260 | 0.0783721 | 0.1044962 |
| Female | 1506  | .yaml | 0.7948207 | 0.7735273 | 0.8149578 | 0.0783721 | 0.1044962 |

797 Data from Figure 6

| identifiable   | gender | pulls  | merge_rate | lower     | upper     |
|----------------|--------|--------|------------|-----------|-----------|
| Gender-Neutral | female | 3270   | 0.70092    | 0.6848969 | 0.7165779 |
| Gender-Neutral | male   | 6623   | 0.64940    | 0.6377726 | 0.6609029 |
| Gendered       | female | 12988  | 0.58046    | 0.5719162 | 0.5889655 |
| Gendered       | male   | 602141 | 0.61150    | 0.6102655 | 0.6127294 |

| identifiable   | gender | pulls  | merge_rate | lower     | upper     |
|----------------|--------|--------|------------|-----------|-----------|
| Gender-Neutral | female | 3697   | 0.88261    | 0.8717927 | 0.8928132 |
| Gender-Neutral | male   | 7593   | 0.89899    | 0.8919880 | 0.9056758 |
| Gendered       | female | 34192  | 0.87526    | 0.8717144 | 0.8787482 |
| Gendered       | male   | 779317 | 0.86841    | 0.8676566 | 0.8691589 |

798 Data from Figure 7

|     | name        | gender | merge_rate | pulls  | lower     | upper     | p           |
|-----|-------------|--------|------------|--------|-----------|-----------|-------------|
|     | all *       | Women  | 0.8135484  | 74164  | 0.8107263 | 0.8163458 | 0.022835966 |
|     | all *       | Men    | 0.8100585  | 570664 | 0.8090384 | 0.8110755 | 0.022835966 |
| 799 | Outsiders * | Women  | 0.6545525  | 25755  | 0.6487085 | 0.6603616 | 0.021833345 |
|     | Outsiders * | Men    | 0.6474362  | 318560 | 0.6457742 | 0.6490955 | 0.021833345 |
|     | OSS *       | Women  | 0.8046290  | 21646  | 0.7992833 | 0.8098928 | 0.000064153 |
|     | OSS *       | Men    | 0.7931353  | 240866 | 0.7915120 | 0.7947514 | 0.000064153 |

800 Data from Figure 8

|     | name      | gender | merge_rate | pulls  | lower     | upper     | p         | p.adj     |
|-----|-----------|--------|------------|--------|-----------|-----------|-----------|-----------|
|     | .js       | Women  | 0.7968797  | 9871   | 0.7888053 | 0.8047786 | 0.1154864 | 0.2438045 |
|     | .js       | Men    | 0.8035147  | 109361 | 0.8011472 | 0.8058662 | 0.1154864 | 0.2438045 |
|     | .rb *     | Women  | 0.8191061  | 10918  | 0.8117551 | 0.8262864 | 0.0022326 | 0.0084837 |
|     | .rb *     | Men    | 0.8067658  | 79106  | 0.8039968 | 0.8095123 | 0.0022326 | 0.0084837 |
|     | .py *     | Women  | 0.8304509  | 6476   | 0.8210864 | 0.8395168 | 0.0000022 | 0.0000422 |
|     | .py *     | Men    | 0.8059777  | 58625  | 0.8027529 | 0.8091720 | 0.0000022 | 0.0000422 |
|     | .java     | Women  | 0.7588874  | 6076   | 0.7479267 | 0.7695991 | 0.5371331 | 0.6003253 |
|     | .java     | Men    | 0.7550679  | 30928  | 0.7502351 | 0.7598527 | 0.5371331 | 0.6003253 |
|     | .php *    | Women  | 0.7826520  | 4012   | 0.7695616 | 0.7953296 | 0.0001380 | 0.0008741 |
| 801 | .php *    | Men    | 0.8076720  | 43762  | 0.8039476 | 0.8113556 | 0.0001380 | 0.0008741 |
|     | .cpp *    | Women  | 0.8567639  | 1131   | 0.8349789 | 0.8766736 | 0.0107035 | 0.0338945 |
|     | .cpp *    | Men    | 0.8244777  | 4633   | 0.8132123 | 0.8353325 | 0.0107035 | 0.0338945 |
|     | .cs       | Women  | 0.7959641  | 446    | 0.7555325 | 0.8324174 | 0.3477016 | 0.4718807 |
|     | .cs       | Men    | 0.8166708  | 1861   | 0.7983280 | 0.8340095 | 0.3477016 | 0.4718807 |
|     | .c        | Women  | 0.7587549  | 257    | 0.7016843 | 0.8097507 | 0.2403862 | 0.3672744 |
|     | .c        | Men    | 0.7214987  | 1709   | 0.6995857 | 0.7426486 | 0.2403862 | 0.3672744 |
|     | .go       | Women  | 0.8346457  | 127    | 0.7584128 | 0.8946318 | 0.0319696 | 0.0867746 |
|     | .go       | Men    | 0.7426440  | 909    | 0.7129164 | 0.7707898 | 0.0319696 | 0.0867746 |
|     | .m        | Women  | 0.7034884  | 344    | 0.6521633 | 0.7512698 | 0.5158375 | 0.6003253 |
| 802 | .m        | Men    | 0.7223509  | 1853   | 0.7013493 | 0.7426464 | 0.5158375 | 0.6003253 |
|     | name      | gender | merge_rate | pulls  | lower     | upper     | p         | p.adj     |
|     | .md       | Women  | 0.7935679  | 9577   | 0.7853209 | 0.8016361 | 0.2395336 | 0.3672744 |
|     | .md       | Men    | 0.7986515  | 111012 | 0.7962803 | 0.8010071 | 0.2395336 | 0.3672744 |
|     | .html *   | Women  | 0.8609432  | 7443   | 0.8528740 | 0.8687285 | 0.0000613 | 0.0005827 |
|     | .html *   | Men    | 0.8424528  | 36707  | 0.8386851 | 0.8461661 | 0.0000613 | 0.0005827 |
|     | .xml *    | Women  | 0.7283582  | 1005   | 0.6997180 | 0.7556538 | 0.0015146 | 0.0071946 |
|     | .xml *    | Men    | 0.7739810  | 7205   | 0.7641442 | 0.7835956 | 0.0015146 | 0.0071946 |
|     | .json     | Women  | 0.8796229  | 1379   | 0.8612726 | 0.8963373 | 0.0454342 | 0.1079061 |
|     | .json     | Men    | 0.8596670  | 13179  | 0.8536196 | 0.8655550 | 0.0454342 | 0.1079061 |
| 803 | .txt      | Women  | 0.7105672  | 2574   | 0.6926209 | 0.7280333 | 0.2510567 | 0.3672744 |
|     | .txt      | Men    | 0.7217755  | 15224  | 0.7145823 | 0.7288838 | 0.2510567 | 0.3672744 |
|     | .yaml     | Women  | 0.8448884  | 851    | 0.8187903 | 0.8685705 | 0.2512930 | 0.3672744 |
|     | .yaml     | Men    | 0.8601388  | 6472   | 0.8514492 | 0.8685025 | 0.2512930 | 0.3672744 |
|     | .rst      | Women  | 0.8588640  | 581    | 0.8278692 | 0.8861511 | 0.8061719 | 0.8061719 |
|     | .rst      | Men    | 0.8634769  | 5905   | 0.8544554 | 0.8721377 | 0.8061719 | 0.8061719 |
|     | .markdown | Women  | 0.8186813  | 364    | 0.7751843 | 0.8569031 | 0.7480275 | 0.7895845 |
|     | .markdown | Men    | 0.8101797  | 3104   | 0.7959330 | 0.8238394 | 0.7480275 | 0.7895845 |
|     | .podspec  | Women  | 0.7974684  | 79     | 0.6920429 | 0.8795729 | 0.4902054 | 0.6003253 |
|     | .podspec  | Men    | 0.8332522  | 3530   | 0.8205394 | 0.8454105 | 0.4902054 | 0.6003253 |

804

805 Data from Figure 9

|     | name       | gender | merge_rate | pulls | lower     | upper     | p         | p.adj     |
|-----|------------|--------|------------|-------|-----------|-----------|-----------|-----------|
|     | 1-1 PRs *  | Women  | 0.6994316  | 10204 | 0.6904303 | 0.7083189 | 0.0000826 | 0.0005781 |
|     | 1-1 PRs *  | Men    | 0.6801416  | 82481 | 0.6769462 | 0.6833244 | 0.0000826 | 0.0005781 |
|     | 2-3 PRs    | Women  | 0.7264195  | 8630  | 0.7168807 | 0.7358051 | 0.7080166 | 0.7080166 |
|     | 2-3 PRs    | Men    | 0.7244491  | 72127 | 0.7211725 | 0.7277076 | 0.7080166 | 0.7080166 |
|     | 4-7 PRs    | Women  | 0.7870947  | 9469  | 0.7787090 | 0.7953035 | 0.1465595 | 0.3419722 |
|     | 4-7 PRs    | Men    | 0.7805019  | 77577 | 0.7775724 | 0.7834104 | 0.1465595 | 0.3419722 |
| 806 | 8-15 PRs   | Women  | 0.8331316  | 10739 | 0.8259430 | 0.8401391 | 0.2238798 | 0.3917896 |
|     | 8-15 PRs   | Men    | 0.8283900  | 85528 | 0.8258462 | 0.8309116 | 0.2238798 | 0.3917896 |
|     | 16-31 PRs  | Women  | 0.8610285  | 11765 | 0.8546460 | 0.8672317 | 0.6290988 | 0.7080166 |
|     | 16-31 PRs  | Men    | 0.8593294  | 85172 | 0.8569764 | 0.8616580 | 0.6290988 | 0.7080166 |
|     | 32-63 PRs  | Women  | 0.8741838  | 10261 | 0.8676119 | 0.8805426 | 0.1378106 | 0.3419722 |
|     | 32-63 PRs  | Men    | 0.8793424  | 74084 | 0.8769752 | 0.8816798 | 0.1378106 | 0.3419722 |
|     | 64-127 PRs | Women  | 0.8815277  | 6415  | 0.8733676 | 0.8893390 | 0.4344413 | 0.6082178 |
| 807 | 64-127 PRs | Men    | 0.8780533  | 50216 | 0.8751595 | 0.8809034 | 0.4344413 | 0.6082178 |

808 Data from Figure 10:

|     | name             | gender | merge_rate | pulls  | lower     | upper     | p         |
|-----|------------------|--------|------------|--------|-----------|-----------|-----------|
|     | One-Timers       | Women  | 0.6881288  | 4970   | 0.6750411 | 0.7009951 | 0.0584516 |
|     | One-Timers       | Men    | 0.6746083  | 35665  | 0.6697178 | 0.6794704 | 0.0584516 |
| 809 | Regulars' First  | Women  | 0.7264195  | 8630   | 0.7168807 | 0.7358051 | 0.7080166 |
|     | Regulars' First  | Men    | 0.7244491  | 72127  | 0.7211725 | 0.7277076 | 0.7080166 |
|     | Regulars' Rest * | Women  | 0.8362559  | 60564  | 0.8332844 | 0.8391950 | 0.0239590 |
| 810 | Regulars' Rest * | Men    | 0.8326080  | 462872 | 0.8315293 | 0.8336825 | 0.0239590 |

811 Initial data from a matching analysis designed for Figure 11, with low statistical power:

|     | identifiable   | gender | merge_rate | pulls  | lower     | upper     | p         |
|-----|----------------|--------|------------|--------|-----------|-----------|-----------|
|     | Gender-Neutral | Women  | 0.9383562  | 146    | 0.8862074 | 0.9714279 | 0.0550119 |
|     | Gender-Neutral | Men    | 0.8598796  | 114    | 0.7823723 | 0.9177788 | 0.0550119 |
|     | Gendered *     | Women  | 0.9009159  | 17470  | 0.8963898 | 0.9053079 | 0.0035203 |
| 812 | Gendered *     | Men    | 0.8934371  | 84458  | 0.8913367 | 0.8955105 | 0.0035203 |
|     | Gender-Neutral | Women  | 0.7214076  | 341    | 0.6705716 | 0.7683509 | 0.4766196 |
|     | Gender-Neutral | Men    | 0.6951504  | 421    | 0.6487274 | 0.7388049 | 0.4766196 |
|     | Gendered       | Women  | 0.6433434  | 7932   | 0.6326877 | 0.6538937 | 0.4190916 |
|     | Gendered       | Men    | 0.6478905  | 115990 | 0.6451338 | 0.6506398 | 0.4190916 |

813 Data from Figure 11

|     | identifiable     | gender | merge_rate | pulls  | lower     | upper     | p         |
|-----|------------------|--------|------------|--------|-----------|-----------|-----------|
|     | Gender-Neutral * | Women  | 0.9129794  | 1356   | 0.8966982 | 0.9274428 | 0.0000436 |
|     | Gender-Neutral * | Men    | 0.8613335  | 1209   | 0.8405602 | 0.8803308 | 0.0000436 |
|     | Gendered         | Women  | 0.8882297  | 29668  | 0.8845895 | 0.8917938 | 0.9251424 |
| 814 | Gendered         | Men    | 0.8884251  | 443756 | 0.8874951 | 0.8893501 | 0.9251424 |
|     | Gender-Neutral   | Women  | 0.6984227  | 1585   | 0.6751608 | 0.7209474 | 0.0510993 |
|     | Gender-Neutral   | Men    | 0.6692715  | 2773   | 0.6514085 | 0.6867765 | 0.0510993 |
|     | Gendered *       | Women  | 0.6188902  | 11498  | 0.6099405 | 0.6277797 | 0.0079927 |
| 815 | Gendered *       | Men    | 0.6310398  | 407913 | 0.6295569 | 0.6325208 | 0.0079927 |
